# Supplementary figures and images for: Healthcare providers’ engagement with eating disorder recovery narratives: opening to complexity and diversity
Source: HighWire-hosted journal article supplement (doi:10.1136/medhum-2019-011723), 2020-03-02

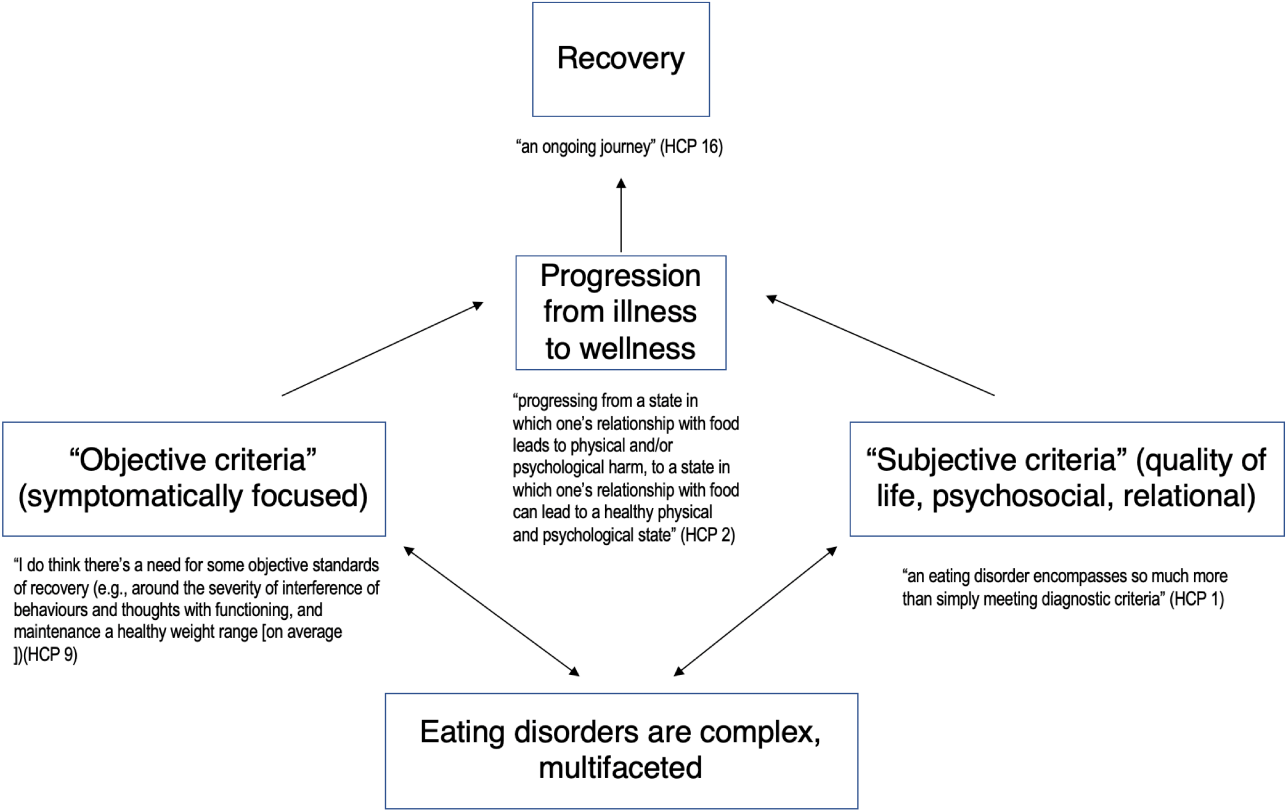

Supplement: medhum-2019-011723supp001_data_supplement.pdf [file medhum-2019-011723supp001_data_supplement.pdf]

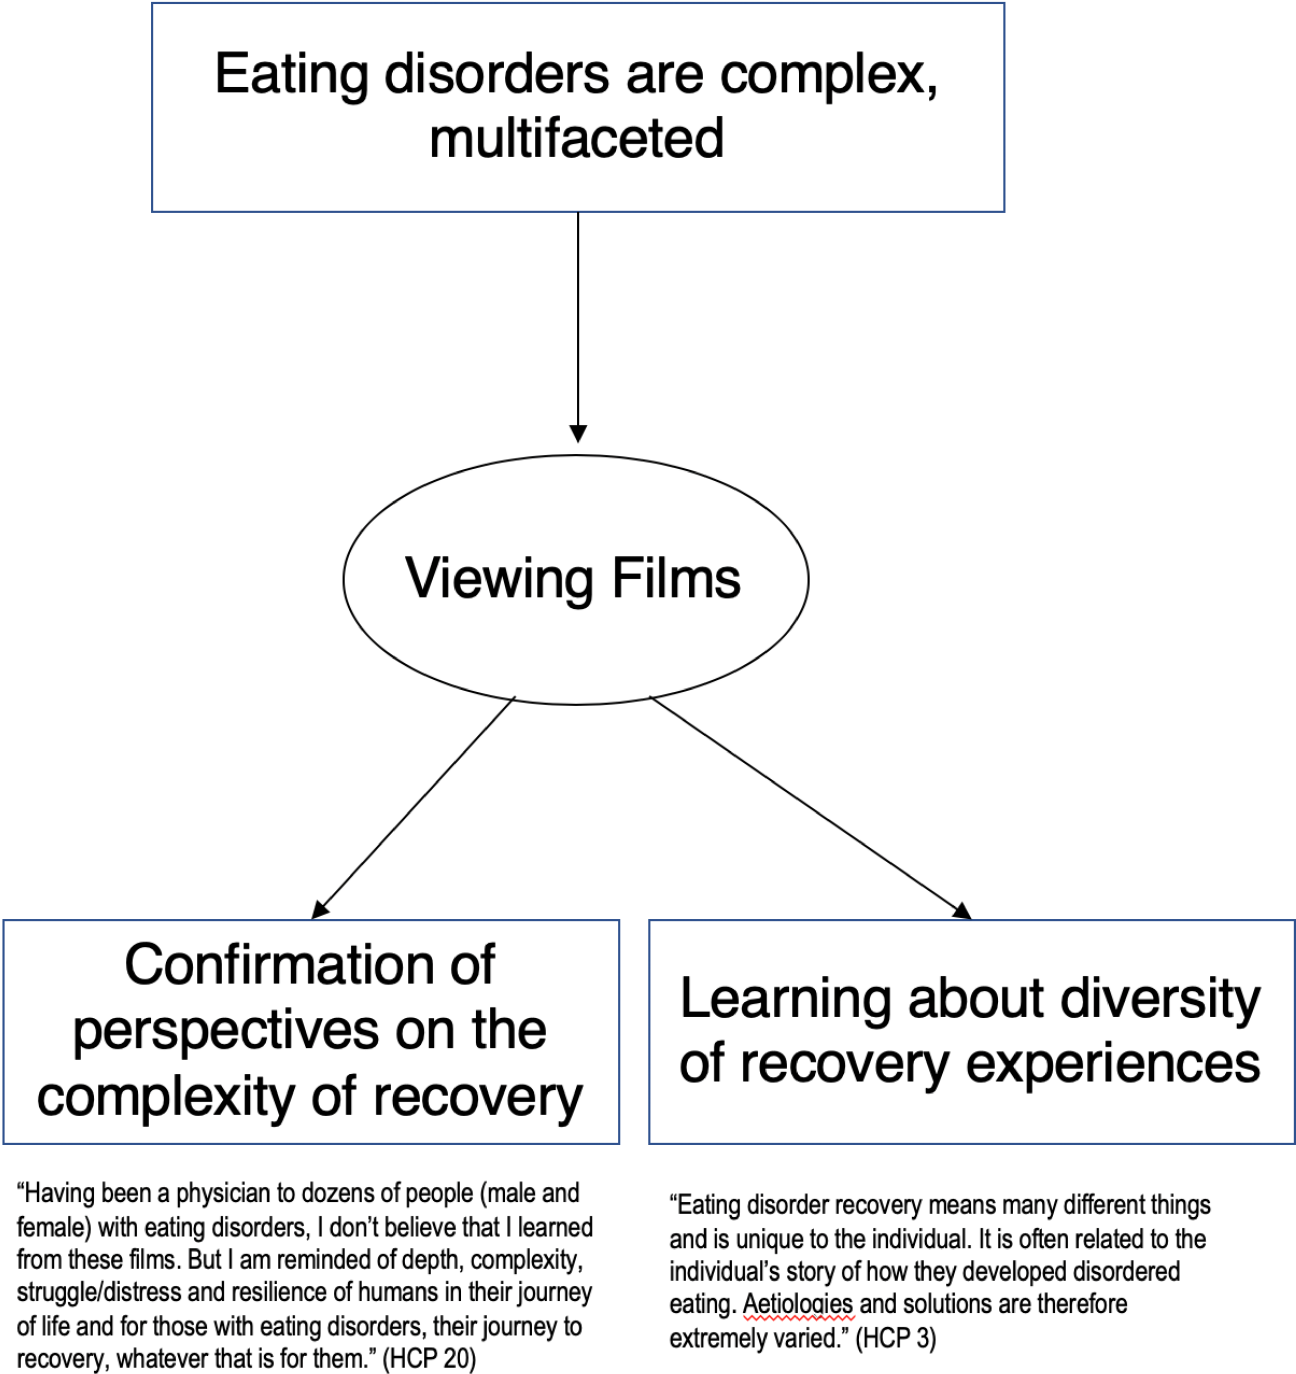

Supplement: medhum-2019-011723supp002_data_supplement.pdf [file medhum-2019-011723supp002_data_supplement.pdf]

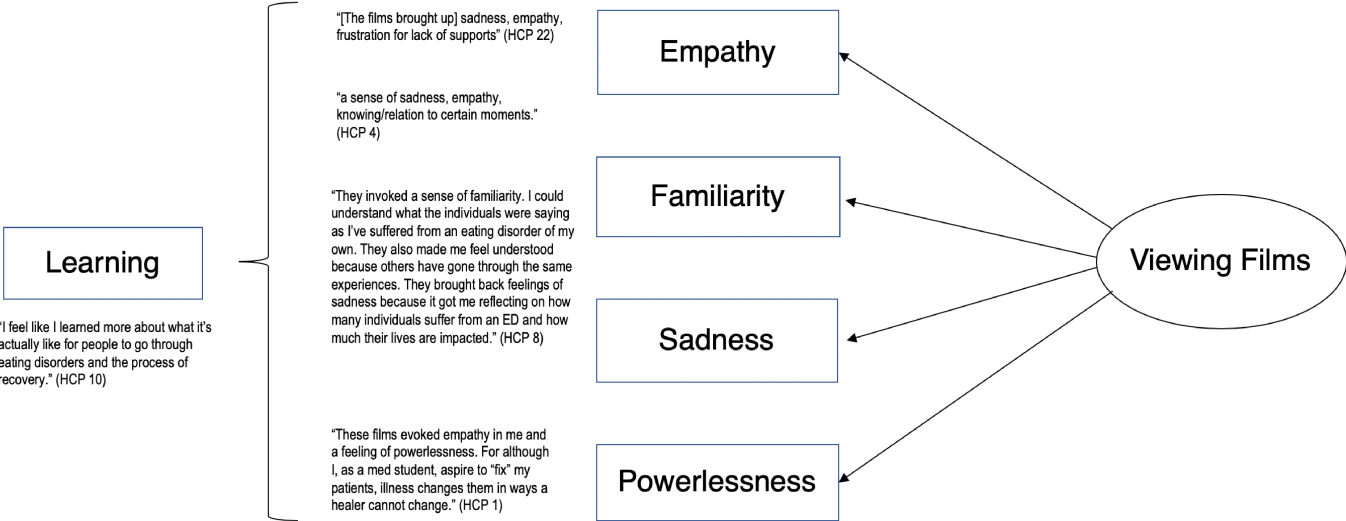

Supplement: medhum-2019-011723supp003_data_supplement.pdf [file medhum-2019-011723supp003_data_supplement.pdf]

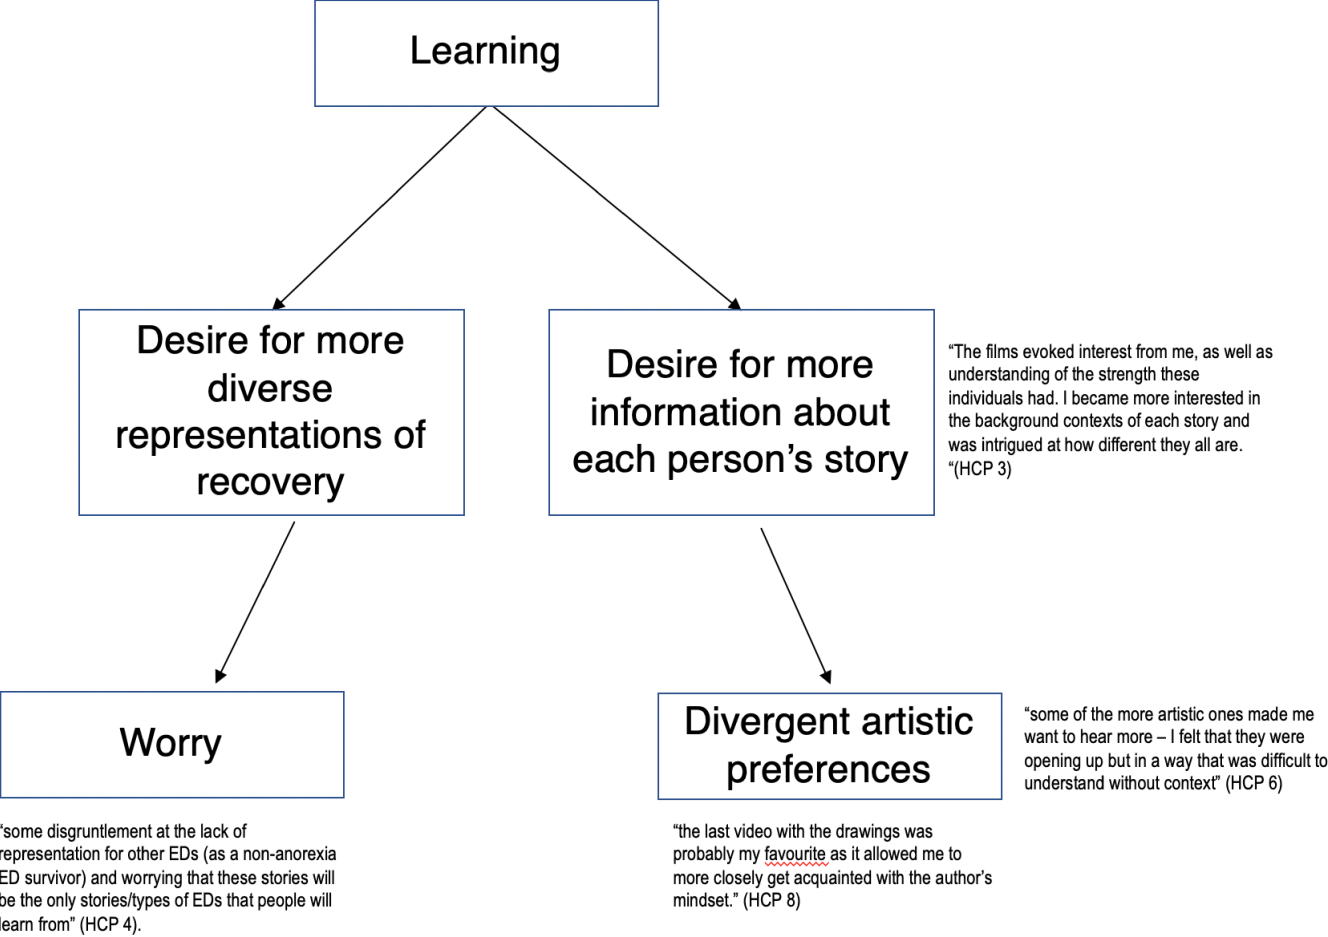

Supplement: medhum-2019-011723supp004_data_supplement.pdf [file medhum-2019-011723supp004_data_supplement.pdf]
